# Supplementary material for: SLC7A2 serves as a potential biomarker and therapeutic target for ovarian cancer
Source: Aging (Albany NY). 2020 Jul 9;12(13):13281–96. doi: 10.18632/aging.103433 (PMC7377849; doi:10.18632/aging.103433)
Supplement: Supplementary File 1 [file aging-12-103433-s001..xlsx]

## Sheet: Sheet1
SLC11A1
SLC15A4
SLC16A10
SLC16A12
SLC17A5
SLC17A6
SLC17A7
SLC17A8
SLC1A1
SLC1A2
SLC1A3
SLC1A4
SLC1A5
SLC1A6
SLC1A7
SLC25A12
SLC25A13
SLC25A15
SLC25A18
SLC25A2
SLC25A22
SLC25A29
SLC25A38
SLC32A1
SLC36A1
SLC36A2
SLC36A3
SLC36A4
SLC38A1
SLC38A10
SLC38A11
SLC38A2
SLC38A3
SLC38A4
SLC38A5
SLC38A6
SLC38A7
SLC38A8
SLC38A9
SLC3A1
SLC3A2
SLC43A1
SLC43A2
SLC6A1
SLC6A11
SLC6A12
SLC6A13
SLC6A14
SLC6A15
SLC6A17
SLC6A18
SLC6A19
SLC6A20
SLC6A5
SLC6A6
SLC6A7
SLC6A8
SLC6A9
SLC7A1
SLC7A10
SLC7A11
SLC7A13
SLC7A14
SLC7A2
SLC7A3
SLC7A4
SLC7A5
SLC7A5P1
SLC7A5P2
SLC7A6
SLC7A7
SLC7A8
SLC7A9
