# Supplementary material for: SLC7A2 serves as a potential biomarker and therapeutic target for ovarian cancer
Source: Aging (Albany NY). 2020 Jul 9;12(13):13281–96. doi: 10.18632/aging.103433 (PMC7377849; doi:10.18632/aging.103433)
Supplement: Supplementary File 2 [file aging-12-103433-s003..xlsx]

## Sheet: Sheet1
Gene Symbol	Module Color
ATXN7L3B	antiquewhite4
CAT	antiquewhite4
LOC101929512	antiquewhite4
CCDC78	antiquewhite4
FAM195B	antiquewhite4
AMZ2P1	antiquewhite4
GABPB1-AS1	antiquewhite4
SMARCD2	antiquewhite4
C17orf89	antiquewhite4
STRA13	antiquewhite4
TNRC18	antiquewhite4
NPAP1	antiquewhite4
OXLD1	antiquewhite4
SLC25A19	antiquewhite4
CANT1	antiquewhite4
FAM104A	antiquewhite4
GPS1	antiquewhite4
LRPAP1	antiquewhite4
WDR1	antiquewhite4
LOC286382	antiquewhite4
ARL16	antiquewhite4
MRPL12	antiquewhite4
MC4R	antiquewhite4
TBCD	antiquewhite4
FN3KRP	antiquewhite4
ATP6V0D1	antiquewhite4
CHMP6	antiquewhite4
C17orf80	antiquewhite4
GSTCD	antiquewhite4
COG4	antiquewhite4
METTL23	antiquewhite4
ZNF549	antiquewhite4
KCTD2	antiquewhite4
NOL11	antiquewhite4
WHSC1	antiquewhite4
TEX2	antiquewhite4
AMZ2	antiquewhite4
ADD1	antiquewhite4
WBP2	antiquewhite4
ARHGEF4	antiquewhite4
THAP9-AS1	antiquewhite4
GATAD1	antiquewhite4
SLC38A10	antiquewhite4
SLC25A10	antiquewhite4
CCDC137	antiquewhite4
HTT	antiquewhite4
LOC440704	antiquewhite4
PCF11	antiquewhite4
LOC100652770	antiquewhite4
ZKSCAN7	antiquewhite4
TACC3	antiquewhite4
FAM96A	antiquewhite4
C17orf70	antiquewhite4
FTSJ3	antiquewhite4
GUCD1	antiquewhite4
DCUN1D5	antiquewhite4
PDHA1	antiquewhite4
ANAPC11	antiquewhite4
STRADA	antiquewhite4
MRPS7	antiquewhite4
SDHAF2	antiquewhite4
KIAA1024	antiquewhite4
NPLOC4	antiquewhite4
ZNF785	antiquewhite4
HCCS	antiquewhite4
HN1	antiquewhite4
ALYREF	antiquewhite4
DHX15	antiquewhite4
AP5B1	antiquewhite4
ZMAT2	antiquewhite4
GGA3	antiquewhite4
CSNK1D	antiquewhite4
JMJD6	antiquewhite4
TACO1	antiquewhite4
MRPL38	antiquewhite4
FAXC	antiquewhite4
GRB2	antiquewhite4
DCAF7	antiquewhite4
CARHSP1	antiquewhite4
ARHGDIA	antiquewhite4
PSMD12	antiquewhite4
NUP85	antiquewhite4
DDX23	antiquewhite4
P2RY14	antiquewhite4
SERPINB1	antiquewhite4
DDX42	antiquewhite4
SLBP	antiquewhite4
EXOC7	antiquewhite4
SRP68	antiquewhite4
TAS2R39	antiquewhite4
PSMC5	antiquewhite4
PIKFYVE	antiquewhite4
ICT1	antiquewhite4
MKRN1	antiquewhite4
LINC01220	antiquewhite4
CCDC88C	antiquewhite4
ZC3H6	antiquewhite4
METAP1	antiquewhite4
COG1	antiquewhite4
SAP30BP	antiquewhite4
HERC5	bisque4
ZNF568	bisque4
ZNF585B	bisque4
ZNF582-AS1	bisque4
ZNF569	bisque4
LINC00664	bisque4
FOS	bisque4
HS3ST3A1	bisque4
ZFP82	bisque4
ZNF626	bisque4
ZNF850	bisque4
ZNF320	bisque4
ZNF442	bisque4
LINC00665	bisque4
ZNF677	bisque4
ZNF354C	bisque4
ZNF542P	bisque4
ZNF625	bisque4
LCTL	bisque4
ZNF382	bisque4
ZFR	bisque4
TRMT10C	bisque4
USP3-AS1	bisque4
ZNF570	bisque4
MEX3D	bisque4
ZNF844	bisque4
ZNF738	bisque4
CAPN3	bisque4
ZNF43	bisque4
MGMT	bisque4
ZNF85	bisque4
NBPF1	bisque4
ZNF529	bisque4
ZNF431	bisque4
ZNF818P	bisque4
HKR1	bisque4
ZNF415	bisque4
LOC101927599	bisque4
ZNF493	bisque4
ARL6IP1	bisque4
RPL24	bisque4
ZNF93	bisque4
ZNF702P	bisque4
VAPA	bisque4
PHF23	bisque4
ZNF257	bisque4
ZNF566	bisque4
HHIPL1	bisque4
ZNF430	bisque4
ZNF136	bisque4
ZNF682	bisque4
ZNF420	bisque4
PTGER4P2-CDK2AP2P2	bisque4
ZNF710	bisque4
ZNF100	bisque4
TEX36-AS1	bisque4
ZNF573	bisque4
C11orf54	bisque4
DRG2	bisque4
DET1	bisque4
ZNF607	bisque4
LOC100268168	bisque4
KLF1	bisque4
TMEM165	bisque4
ZNF443	bisque4
ZNF260	bisque4
ZNF665	bisque4
MPDU1	bisque4
AKAP10	bisque4
FUS	bisque4
ZNF253	bisque4
ZNF91	bisque4
ZNF195	bisque4
TOMM70A	bisque4
ZNF736	bisque4
ZNF563	bisque4
TVP23C	bisque4
UBXN1	bisque4
ZNF347	bisque4
ZNF468	bisque4
NAT9	bisque4
MTMR14	bisque4
ZNF808	bisque4
R3HCC1L	bisque4
PPIF	bisque4
MMS19	bisque4
KDM3B	bisque4
ADPRM	bisque4
SPAG7	bisque4
SLC44A1	bisque4
ZNF708	bisque4
RIBC2	bisque4
RBBP4	bisque4
FBXL3	bisque4
NPM3	bisque4
ZNF83	bisque4
ZNF440	bisque4
AMMECR1L	bisque4
ZXDA	bisque4
CIDEA	bisque4
SUDS3	bisque4
ZNF254	bisque4
TCAM1P	bisque4
CCR7	bisque4
IPO5P1	bisque4
PRKAG1	bisque4
RANGRF	bisque4
LAIR1	bisque4
ZNF680	bisque4
ZNF763	bisque4
ZNF681	bisque4
ZNF14	bisque4
C17orf59	bisque4
PHLDB2	bisque4
ELAVL1	bisque4
EXOSC1	bisque4
HYPK	bisque4
LOC101927849	bisque4
XPNPEP1	bisque4
LRIF1	bisque4
HRH4	bisque4
HEXA	bisque4
ZNF709	bisque4
OCEL1	bisque4
ZNF675	bisque4
JAZF1-AS1	black
CLCA1	black
BID	black
NR4A1	black
LINC00870	black
NBPF3	black
CPEB1	black
AK2	black
MTRF1	black
FLJ38379	black
CEP63	black
GRAMD1C	black
VPS29	black
ST8SIA5	black
SMAP2	black
MPLKIP	black
METTL18	black
RASL10A	black
ADCY9	black
TAS2R4	black
KPNA4	black
GPR111	black
ZNF671	black
SHE	black
C9orf78	black
WDR92	black
HEMGN	black
LINC00970	black
INGX	black
TPRKB	black
HAUS1	black
PAK1	black
OSTF1	black
CLEC4C	black
GAS7	black
MAPK8IP3	black
TPGS2	black
CREB1	black
SLC8A1-AS1	black
LOC101927248	black
SNRNP200	black
CD28	black
PIK3R4	black
LOC100505811	black
NMRK1	black
IMPACT	black
THPO	black
DAB1	black
MTMR2	black
HNRNPUL2	black
TAS2R14	black
PRKRIR	black
COA4	black
OCLM	black
LOC101928273	black
SORD	black
FUT8	black
LOC401134	black
LOC102724965	black
TAS2R38	black
CD33	black
RANBP3L	black
BOLL	black
RXFP2	black
PRPSAP2	black
CLINT1	black
CNIH4	black
C11orf31	black
LINC00408	black
LOC102723661	black
CENPL	black
FAM135A	black
SPRR2G	black
UBL4A	black
POU3F1	black
RANBP2	black
GSTA4	black
LZIC	black
CCDC65	black
UBXN2B	black
GPR174	black
EIF5A2	black
SLC25A16	black
ANAPC4	black
BAALC	black
THOC7	black
ACOXL	black
NMNAT1	black
KCTD20	black
SLC16A9	black
TNFRSF14	black
PKP4	black
MAP3K12	black
CFL1	black
CACYBP	black
LOC101927066	black
ARMC3	black
NR1D2	black
PCNP	black
CDHR1	black
GLRB	black
LOC101929167	black
C8orf44	black
FLJ25917	black
RQCD1	black
GPR1-AS	black
GLO1	black
PTPRG	black
SLC25A45	black
CASP7	black
RYR2	black
LOC100133315	black
LOC646626	black
TMEM63A	black
HAO1	black
CCNI	black
STAP1	black
LOC101927552	black
LGSN	black
PTER	black
TTLL1	black
ITSN2	black
LOC100129069	black
SMIM19	black
SH3D19	black
RPA1	black
LPIN3	black
LOC101927416	black
FIRRE	black
TDP1	black
TBC1D19	black
GOLGA7	black
CNPPD1	black
CUTA	black
NUDT4	black
LOC101928504	black
POU5F1P3	black
LINC00240	black
B3GALT6	black
OBSCN	black
LOC102724612	black
LOC284933	black
CLEC4F	black
TRIM33	black
POLE4	black
GAS6-AS1	black
ACYP1	black
C1orf95	black
DAPK1-IT1 /// DAPK1-IT1	black
LOC101928907	black
FDPS	black
COL4A3BP	black
FAM127A	black
LOC100130476	black
C11orf73	black
LOC100130078	black
POU6F2-AS2	black
OR8G1	black
HES5	black
PTGDS	black
LOC101927967	black
REG4	black
PTK6	black
GML	black
LOC153684	black
POLR2G	black
GPR132	black
ASNSD1	black
NDST1	black
NPFF	black
VAC14-AS1	black
MAPK9	black
VPS13C	black
PTPN5	black
TNN	black
PGRMC1	black
RNF6	black
GNG5	black
HEATR5B /// HEATR5B	black
DDIAS	black
EME1	black
CBX1	black
BCAR4	black
SLC39A6	black
ATOX1	black
PTCD3	black
TRIM63	black
OTUD3	black
GGNBP2	black
C2orf76	black
HNF1A	black
PAIP2	black
LOC100996583	black
ILF2	black
SLC39A4	black
LOC101926913	black
LOC100133669	black
ANKRD33	black
CLDN5	black
SPATA13	black
PLCG1-AS1	black
POU5F1B	black
SERPINA9	black
CCDC148	black
LOC285191	black
KNSTRN	black
C21orf119	black
DUSP15	black
AHSA1	black
ERI3	black
PLRG1	black
CDC23	black
SLC4A1AP	black
PHF8	black
TAAR8	black
SLC6A16	black
HSPE1	black
NR2C1	black
RNASE11	black
C6orf106	black
DAP	black
RALGAPA2	black
ASIP	black
NAA35	black
GLYAT	black
SMIM13	black
LOC100129406	black
GPR61	black
ABRACL	black
PCDHAC1	black
CHRD	black
HECA	black
TRIM26	black
FAM214B	black
CHTOP	black
R3HDM1	black
TAF12	black
LOC101927211	black
ERVK13-1	black
LINC00518	black
NAPRT	black
FRMD8	black
NARS2	black
SSTR5-AS1	black
PLD4	black
SUPT7L	black
DND1	black
INTS5	black
TMED6	black
CCDC114	black
NOSTRIN	black
ZFC3H1	black
GALNTL6	black
HSPA12A	black
COL25A1	black
LGI2	black
KRT83	black
PTPN21	black
PUS10	black
TSHB	black
TFG	black
PYY	black
GLTSCR1L	black
SPATA6L	black
ADO	black
CEPT1	black
SLC39A10	black
C15orf41	black
CA12	black
CACNA1E	black
MEN1	black
VPS37C	black
LOC101929109	black
SRL	black
NR2F2-AS1	black
BEND7	black
ADAMTS9-AS2	black
AAMDC	black
LOC102723390	black
POU5F1P4	black
SLC51B	black
COL4A3	black
WDR65	black
RBBP8	black
LOC102724561	black
LOC100288570	black
CCDC102B	black
MFAP1	black
IGSF22	black
LOC101927196	black
LOC728084	black
GNG12	black
NDUFAF4	black
FAM13A-AS1	black
CLP1	black
PANX1	black
THAP10	black
LARS	black
DNAJB13	black
KREMEN2	black
CLPS	black
VN1R2	black
NAALADL2	black
ADCY5	black
ARID2	black
ZBTB44	black
LOC100289361	black
OR8B8	black
C10orf71	black
LOC101929378	black
LHFPL4	black
SCN2A	black
MMP27	black
MON2	black
ASCC1	black
IL37	black
ARPC2	black
LYRM1	black
LOC101928716	black
MED10	black
PJA1	black
MORC1	black
TMED5	black
ALK	black
HAL	black
UBQLN1	black
C1QTNF3	black
LOC101927181	black
KDM4C	black
SULT1C2	black
SLC22A31	black
HIVEP1	black
BAIAP3	black
REG3G	black
DNAH7	black
NANS	black
ITFG1	black
RPS3	black
CYP4F62P	black
YIPF5	black
MADCAM1	black
LOC101929335	black
EHHADH	black
SCN3A	black
SLC22A13	black
GPR34	black
TGDS	black
FAM83E	black
EMILIN3	black
CPXM2	black
HAPLN2	black
PIWIL4	black
LOC100506351	black
LOC100507520	black
IARS	black
RRH	black
SCARNA2	black
WISP1	black
KIF1C	black
PP7080	black
GLRX5	black
RHOA	black
CAPRIN2	black
SECISBP2	black
UPP2	black
TBC1D8	black
FAM114A1	black
CKAP5	black
FCHO2	black
MUT	black
CNOT11	black
DCTN3	black
PDE6A	black
NTS	black
PCBP2	black
NDUFB4	black
PPP1R32	black
INSM1	black
TOP1	black
CSF3R	black
C3orf62	black
RIPK1	black
AJUBA	black
EFHC1	black
KSR2	black
RAPGEF6	black
LINC00955	black
PLOD2	black
CSRNP1	black
MCUR1	black
IL36G	black
ZNF831	black
HECTD4	black
LOC101929528	black
OR2K2	black
DPYS	black
CYP4Z1	black
CEP72	black
LOC101928283	black
PTAFR	black
CKS1B	black
LOC102723542	black
TRBV27	black
PRPF39	black
CAPN12	black
SLC35F5	black
IRGQ	black
FAM20A	black
TRPC6	black
FOXN3-AS2	black
LINC01021	black
AVIL	black
PGAM2	black
CCDC62	black
LOC441081	black
ZMYND8	black
LRRC69	black
SLC6A14	black
LINC01300	black
TMEM126A	black
CLIC4	black
NSMCE1	black
LOC101927164	black
TCEA1	black
CCDC25	black
PXYLP1	black
CA1	black
NEK10	black
CLGN	black
CLEC2D	black
LOC101928555	black
CAPN14	black
JUN	black
TNKS1BP1	black
TRIM14	black
SPIN2A	black
FAM120A	black
SYBU	black
PRKAA2	black
PRO1596	black
ARID4A	black
PSMG1	black
BCAS2	black
ZNF518A	black
QRICH2	black
FLII	black
LOC100506405	black
C14orf169	black
DCST1	black
C15orf61	black
HINT2	black
APELA	black
NRD1	black
CAGE1	black
LOC101928861	black
ZNF75D	black
SCRG1	black
LOC221814	black
EID1	black
INPP4A	black
NDRG4	black
TMEM187	black
FARSB	black
LINC00868	black
LOC100506172	black
PSMD10	black
C1orf123	black
CALM1	black
ZBTB11	black
C9orf135	black
CDKL2	black
COLEC11	black
ERVH48-1	black
LOC100131864	black
NAPSA	black
USP19	black
SFXN5	black
STIM1	black
ABCD2	black
POLE3	black
CCDC150	black
GPX2	black
NDRG3	black
IPO11	black
LOH12CR1	black
PURG	black
UNC5CL	black
CCZ1B	black
PITX3	black
MRPS5	black
C6orf141	black
PRDX6	black
MAB21L2	black
LOC101929319	black
ADAL	black
PRO1082	black
DNTTIP1	black
ATP2C1	black
MEIS3P1	black
RANBP9	black
ANKRD20A12P	black
RSU1P2	black
SALL3	black
MFSD4	black
RPS27A	black
TUBGCP4	black
CLTC	black
MYSM1	black
NHLRC3	black
ENTPD1	black
METTL9	black
GPR18	black
PITPNA	black
HLA-DPB2	black
SWI5	black
TCEAL4	black
CABS1	black
CAP2	black
GPR115	black
PRO1483	black
LARP7	black
KIAA1257	black
MIR5188	black
PP13439	black
DUT	black
CCNT2	black
ATF6	black
C6orf89	black
ZFAND2B	black
NAPSB	black
TBC1D10B	black
LOC101927770	black
PP2672	black
UNC13A	black
WDR19	black
LINC00566	black
ZSWIM8	black
TG	black
ANKRD13D	black
PTCSC1	black
COL4A4	black
SNTB2	black
LINC00355	black
IPO9-AS1	black
GNB3	black
MOGAT1	black
SLC30A2	black
SLC17A4	black
ARAP1	black
HNRNPAB	black
ZNF322	black
CYP2C19	black
CDH17	black
FGR	black
YIF1A	black
NIPA2	black
ACOT9	black
TMEM41B	black
SCN7A	black
OTUD4	black
DIP2B	black
KLRAP1	black
ENO2	black
RUNX1-IT1	black
ATG4C	black
CHRNA6	black
UTS2	black
VNN3	black
LCMT2	black
KCNJ2	black
TBC1D7	black
C5AR1	black
C15orf40	black
NWD2	black
PRR29	black
DLEU7-AS1	black
TIPRL	black
SHH	black
FAM107B	black
PACS1	black
TAS2R10	black
LINC00086	black
ZNF788 /// ZNF788	blue
TTR	blue
ADAM3A	blue
GPR182	blue
CLVS1	blue
CDX1	blue
HRH2	blue
LINC01343	blue
ZNF483	blue
FAM47B	blue
CLYBL-AS2	blue
LINC00577	blue
MYCBPAP	blue
PPEF1	blue
SPATA3-AS1	blue
LOC400548	blue
DEPDC4	blue
HAS1	blue
SDK2	blue
TM7SF3	blue
CD79A	blue
ACRBP	blue
CDHR2	blue
LOC100506142	blue
PET100	blue
AK091028 /// GMDS-AS1	blue
DNM1P46	blue
LOC100129175	blue
GIPR	blue
UBASH3A	blue
LOC101928101	blue
MUC8	blue
LRRC15	blue
SCYL3	blue
LOC102723692	blue
HP08942	blue
SPATA25	blue
SLC39A12	blue
FAM149B1	blue
ZBED4	blue
LINC00926	blue
PLCB2	blue
CYP2A7P1	blue
LOC100287098	blue
RBMS3-AS3	blue
LINC00939	blue
SLC46A2	blue
KCNA10	blue
CD27	blue
HIPK1-AS1	blue
GZMM	blue
LOC91450	blue
LINC00445	blue
XKR8	blue
IRGC	blue
SMTNL1	blue
CYP2A13	blue
KCNH1	blue
ACSM1	blue
ZNF835	blue
LINC01282	blue
APC2	blue
LOC283194	blue
LOC285422	blue
CEMP1	blue
LOC101928255	blue
LOC101929225	blue
LOC101929450	blue
GFAP	blue
B4GALT2	blue
LOC100507630	blue
PDE7A	blue
ACSM2A	blue
NFIA-AS2	blue
PRO2958	blue
TBX6	blue
KLHL10	blue
GALNT9	blue
GYPE	blue
LINC00421	blue
TNXB	blue
LOC101926934	blue
IL17F	blue
LOC101928708	blue
TP53TG5	blue
IFNA1	blue
NPAS1	blue
CYP4F22	blue
PRF1	blue
DIO3OS	blue
MATN1	blue
PRDM8	blue
SYTL2	blue
C6orf195	blue
FAM228A	blue
MYBPC3	blue
LOC101929144	blue
LOC101927150	blue
LOC101927069	blue
PRKCD	blue
LINC00661	blue
PLA2G5	blue
HHATL	blue
SEMG2	blue
DMRTB1	blue
LINC01242	blue
LOC339807	blue
LOC100506999	blue
POLN	blue
NDUFB2-AS1	blue
SFRP5	blue
LOC285857	blue
CD5L	blue
TPSG1	blue
LOC285768	blue
KLK3	blue
LINC00638	blue
C10orf85	blue
SPATA31C2	blue
LINC01233	blue
ZNF556	blue
MR1	blue
LRRC36	blue
ALLC	blue
NCAN	blue
LOC101927274	blue
GPR26	blue
CDX4	blue
LOC400965	blue
GRK1	blue
LINC00299	blue
LOC101926916	blue
LOC100507336	blue
LOC100506274	blue
BIRC7	blue
LOC101928748	blue
GTSF1L	blue
TMEM253	blue
SLC34A3	blue
ADARB2	blue
WFDC9	blue
HIST1H2BN	blue
SPAG11A	blue
LOC101928886	blue
FOXP3	blue
FLJ30679	blue
FBLL1 /// FBLL1	blue
LDOC1	blue
HBZ	blue
FANCM	blue
GIGYF1	blue
TEKT1	blue
TMPRSS6	blue
LOC400692	blue
LOC101928537	blue
IGLL1	blue
GMFB	blue
MIR670HG	blue
FCN2	blue
LOC100507560	blue
LOC101928087	blue
CYP26B1	blue
CLIP1-AS1	blue
CXCR5	blue
H1FOO	blue
TMEM190	blue
CKMT2-AS1	blue
FGD5	blue
LXN	blue
TKTL2	blue
TNFRSF8	blue
HOXD12	blue
BHLHE22	blue
RTP5	blue
C19orf26	blue
SHMT1	blue
SHD	blue
BAI1	blue
ANHX	blue
IRAK4	blue
LOC100505570	blue
PRDM9	blue
SMC1B	blue
MYH2	blue
PPAPDC2	blue
ETFB	blue
FBXO40	blue
PCDHGC4	blue
ADAMTS13	blue
RNF31	blue
CRYGD	blue
LOC101926963	blue
GDF11	blue
ZBTB46-AS1	blue
LOC100505978	blue
CMA1	blue
TFDP3	blue
ZPBP2	blue
STX1B	blue
SLC16A8	blue
LINC01169	blue
TMEM218	blue
FCGR2B	blue
SEPSECS	blue
PCYT1B	blue
KCNIP2	blue
LOC645321	blue
IQCF5-AS1	blue
KIF25	blue
CCDC136	blue
CACNA1S	blue
GIPC3	blue
PNMAL2	blue
AQP2	blue
BIN2	blue
CDHR5	blue
RPS6KA4	blue
LINC00895	blue
PYY2	blue
LOC101929078	blue
LOC100506472	blue
GPR37L1	blue
LOC253573	blue
ENC1	blue
ERMN	blue
RAD54B	blue
EEF1A1	blue
SPATA21	blue
WDFY4	blue
KANK3	blue
ADRA2B	blue
IQCF4	blue
FAM53B	blue
NLRP14	blue
ZBTB20-AS1	blue
LINC01289	blue
TEX13A	blue
RGS9	blue
DIAPH3-AS1	blue
GNA14-AS1	blue
PRSS58	blue
ONECUT1	blue
LOC100128108	blue
ALPI	blue
TMPRSS5	blue
TMEM225	blue
CCDC37	blue
BREA2	blue
CDR1	blue
NR0B1	blue
RHBG	blue
MROH8	blue
PRB1	blue
FNDC7	blue
DYDC1	blue
LILRB3	blue
LINC00242	blue
DOCK2	blue
LOC101929297	blue
AP3B2	blue
LOC100506175	blue
DPT	blue
OR4D1	blue
C20orf173	blue
LOC285957	blue
LINC01312	blue
TUT1	blue
TTTY10	blue
JPX	blue
LOC100506047	blue
REXO1	blue
IHH	blue
LOC102724842	blue
LOC286238	blue
TEX14	blue
PDE6G	blue
POGLUT1	blue
LOC100130370	blue
LINC00302	blue
BRDT	blue
SLC25A47	blue
GTF3C2-AS1	blue
MPO	blue
DLEC1	blue
ANKRD30B	blue
IQCF6	blue
CHRNB2	blue
C14orf93	blue
TEX22	blue
LOC101928779	blue
LINC01019	blue
NAA15	blue
RNMT	blue
C7orf33	blue
RCAN1	blue
BPIFB6	blue
MYH1	blue
ABCC8	blue
IL36B	blue
DEFB125	blue
LOC101928881	blue
MAP2K5	blue
MYO1A	blue
SNX22	blue
TEX35	blue
SPATA16	blue
FOXK1	blue
MSMB	blue
MYH8	blue
SPAG8	blue
FAM170A	blue
DSPP	blue
VN1R4	blue
KIAA1045	blue
TRPC2	blue
TBC1D21	blue
LCT	blue
CCL27	blue
LRTM1	blue
LOC100996694	blue
LOC100129129	blue
SLAMF8	blue
MYF6	blue
TSNARE1	blue
LINC00482	blue
HAAO	blue
CNTFR-AS1	blue
DLGAP2	blue
TRIML1	blue
ZMAT3	blue
LOC100128751	blue
MYO6	blue
P2RX3	blue
FLJ30064	blue
LOC101928682	blue
LOC101929926	blue
LOC101928700	blue
SSC5D	blue
CD151	blue
SLC9A5	blue
SLC16A11	blue
FASTKD2	blue
LINC01149	blue
HPCA	blue
LOC100240734	blue
C6orf118	blue
MTRR	blue
HAR1A	blue
LOC101927411	blue
LOC102723847	blue
LOC101927660	blue
LOC100506258	blue
LOC101930421	blue
MNDA	blue
GPD1	blue
WDR62	blue
UBQLN2	blue
TBX19	blue
SCART1	blue
SLC22A7	blue
PRDM12	blue
IL12RB1	blue
SCARF2	blue
LILRA4	blue
FGF14-IT1	blue
GLTSCR1	blue
CSMD3	blue
DGCR6L	blue
LIPE-AS1	blue
C1orf167	blue
PGLYRP1	blue
MCMDC2	blue
JAKMIP2-AS1	blue
2020-03-01	blue
VPS8	blue
LOC100128325	blue
LINC00906	blue
CACNG7	blue
CNBD2	blue
ACPT	blue
FAM95A	blue
MAP1LC3C	blue
CASC18	blue
FSHB	blue
FLJ90680	blue
FAM71C	blue
COX6A2	blue
C1QC	blue
POU3F4	blue
RNF213	blue
LILRP2	blue
SLC5A12	blue
RBFADN	blue
TNR	blue
CDH22	blue
B4GALNT4	blue
KIRREL3-AS2	blue
ACADSB	blue
SSTR3	blue
LOC101927417	blue
SLC22A8	blue
SLC52A1	blue
RCVRN	blue
SLC18A1	blue
OR13C4	blue
CD79B	blue
LILRB2	blue
CD1C	blue
LPAL2	blue
SMG7-AS1	blue
WWC1	blue
PLD6	blue
IBA57-AS1	blue
TMEM168	blue
FUT5	blue
LOC285000	blue
ADIG	blue
OR8G2	blue
LINC00441	blue
LALBA	blue
EIF3J-AS1	blue
MTHFD1L	blue
C9orf62	blue
APOA5	blue
IGHD	blue
LOC654841	blue
LTF	blue
LOC101928909	blue
RGMB-AS1	blue
ANKRD26P3	blue
SPATA32	blue
CHRNG	blue
RGN	blue
PDX1	blue
LOXHD1	blue
LOC101928597	blue
LILRB4	blue
LINC01016	blue
CCR5	blue
ZNF259P1	blue
C1orf220	blue
LOC102723886	blue
MUC17	blue
SHANK1	blue
C20orf181	blue
LOC285692	blue
VPS13B	blue
OR1Q1	blue
PDE6B	blue
LOC101927122	blue
SLC26A1	blue
LOC100506489	blue
MGC34796	blue
GLP1R	blue
CHAT	blue
MED15P9	blue
ACTR3BP2	blue
IL3	blue
TMC1	blue
TSPAN16	blue
LOC284788	blue
MYADML2	blue
KLK2	blue
A1BG-AS1	blue
LOC101929488	blue
SEPT5-GP1BB	blue
OOEP	blue
NKX6-1	blue
LOC101927396	blue
LOC101928869	blue
SPATA31E1	blue
IL10RB-AS1	blue
CD4	blue
LINC00317	blue
C10orf71-AS1	blue
FRMPD1	blue
LOC101929172	blue
LOC102724508	blue
ERVK3-2	blue
OR5L2	blue
MAS1L	blue
TEX28	blue
DNTT	blue
SCGN	blue
DDX3Y	blue
ZNF18	blue
LOC100128176	blue
RDH12	blue
BTF3P11	blue
LOC101927406	blue
LOC100240728	blue
BEST4	blue
CHRND	blue
GPATCH8	blue
SLC12A1	blue
TMEM239	blue
DICER1-AS1	blue
FAM71A	blue
STH	blue
C1QA	blue
DMRTA1	blue
LINC00700	blue
LOC283177	blue
CTC-360P9.3	blue
CD84	blue
TBX5	blue
LOC100130548	blue
DHRS7C	blue
AURKC	blue
SYNC	blue
TRIM42	blue
MS4A3	blue
CNTFR	blue
LOC102725454	blue
OR10H1	blue
DKFZP434A062	blue
TSPAN11	blue
GTF2IRD2B	blue
SNX8	blue
LHFPL3-AS1	blue
LOC729732	blue
CHADL	blue
ACRV1	blue
LOC101928557	blue
MUC3	blue
ADI1	blue
C1orf87	blue
PNLIPRP2	blue
CLEC4G	blue
TP53BP1	blue
LOC100631378	blue
ATL1	blue
GRIK4	blue
LINC00892	blue
S1PR4	blue
CYP46A1	blue
CACNG2	blue
IPMK	blue
RRAGA	blue
GRAPL	blue
LOC101927582	blue
PAX3	blue
SHISA7	blue
CIRBP-AS1	blue
FOXN4	blue
PDHA2	blue
FAM9B	blue
MIRLET7DHG	blue
NCF4	blue
PEX7	blue
GFI1B	blue
LILRB5	blue
C5orf58	blue
CD7	blue
GSTA3	blue
LOC101929153	blue
C14orf180	blue
FAM9C	blue
PRRX2-AS1	blue
HADHB	blue
TUSC8	blue
BTBD17	blue
NFRKB	blue
ARMC5	blue
ATR	blue
OR1F1	blue
SLC24A2	blue
LOC644090	blue
GADL1	blue
GALNTL5	blue
LOC554174	blue
SIGLEC10	blue
LOC101929497	blue
ELSPBP1	blue
PPP1R3F	blue
LAMA5-AS1	blue
IZUMO2	blue
CCL24	blue
LOC101927362	blue
LOC100506790	blue
GPC3	blue
MKRN7P	blue
NEU2	blue
LOC648987	blue
PPBPP2	blue
LOC101928031	blue
DKK4	blue
LOC101927722	blue
ST7-AS2	blue
IGFBP7-AS1	blue
MAGEB4	blue
LOC100507403	blue
CEP192	blue
FGGY	blue
CC2D1B	blue
FAM49A	blue
LOC100506679	blue
SYCN	blue
GABRB1	blue
CNTN2	blue
APOL5	blue
SOX14	blue
LOC101927331	blue
LOC101928823	blue
LINC00202-1	blue
VSX1	blue
OTOS	blue
VASH1	blue
CRYBB3	blue
TMEM213	blue
LRRC72	blue
LOC101928651	blue
MAP1A	blue
HLA-DOA	blue
MYH11	blue
LOC101929123	blue
TBRG1	blue
ICOS	blue
TWF1	blue
WDR64	blue
NAALADL2-AS3	blue
FANCD2OS	blue
CECR9	blue
CTF1	blue
FAM178B	blue
TMEM86B	blue
IL5RA	blue
LINC00880	blue
PRB3	blue
KIR2DL2	blue
FAM212B-AS1	blue
ZSWIM7	blue
ENPP7	blue
SPRN	blue
LOC221122	blue
OR1C1	blue
KIF9-AS1	blue
VWA3A	blue
ART1	blue
LOC100129550	blue
PAGE4	blue
MYO15A	blue
FGF8	blue
ATP6V1G3	blue
RAPSN	blue
MAGI1-IT1	blue
DEFB119	blue
LOC100129476	blue
IL12A-AS1	blue
SLA	blue
GJD2	blue
DEFB127	blue
D21S2090E	blue
NINL	blue
IGH /// IGHE /// IGHE /// IGHE	blue
NAV2-IT1	blue
NBR1	blue
ACADS	blue
OR1J2	blue
TTC16	blue
XAGE3	blue
LOC101929609	blue
FBRSL1	blue
DAND5	blue
DZIP3	blue
MT3	blue
CALR3	blue
LRTM2	blue
EYA1	blue
GHRL	blue
LOC101929526	blue
LINC00202-2	blue
LOC100996455	blue
LOC100289061	blue
TYROBP	blue
TBCEL	blue
TMEM132B	blue
RHBDF2	blue
OTOP2	blue
FLJ13224	blue
TMSB4Y	blue
SNORA43	blue
OR2L2	blue
LOC101927783	blue
PPHLN1	blue
TMEM132E	blue
TXNDC2	blue
RAB40A	blue
ZNF385A	blue
CDK5R2	blue
OPCML	blue
CYP4F8	blue
F7	blue
LOC285847	blue
WDR59	blue
IGSF11-AS1	blue
C2orf73	blue
ORC4	blue
CRYBB2	blue
LLGL1	blue
HEXB	blue
TAS1R1	blue
FLJ36840	blue
OR1J4	blue
KRTAP19-3	blue
ZCRB1	blue
NCOA7	blue
TIGD4	blue
SCT	blue
LOC101927843	blue
CTPS2	blue
SSPO	blue
IRX4	blue
TAS2R45	blue
CYP2W1	blue
LINC01142	blue
CCK	blue
LRRC16B	blue
APOBEC1	blue
KIAA0226	blue
ARX	blue
LOC100131756	blue
ZNF324B	blue
LOC283692	blue
GOT1L1	blue
WNT9B	blue
CA4	blue
SRD5A3-AS1	blue
LOC340107	blue
ADAM6	blue
PZP	blue
LOC729296	blue
LINC01310	blue
C3orf43	blue
GOLGA6A	blue
NKG7	blue
HDC	blue
VMO1	blue
FAM71F2	blue
FAM205B	blue
LILRB1	blue
CRB1	blue
APOC2	blue
CYP2B7P	blue
COQ9	blue
CHRNA2	blue
CACNG6	blue
LINC00314	blue
AVPR2	blue
TLX1	blue
ZACN	blue
EDA2R	blue
LOC100507562	blue
PTGDR2	blue
LOC284632	blue
ANKRD60	blue
LRP5L	blue
LOC150005	blue
NXF5	blue
CEACAM21	blue
SLC30A3	blue
PATE1	blue
OR10D3	blue
MYL1	blue
CCDC173	blue
ALS2CR12	blue
SGCA	blue
DIRAS1	blue
RNASEH1	blue
LOC100130872	blue
SNCG	blue
ENTPD3-AS1	blue
LOC101929760	blue
ZCCHC13	blue
IL16	blue
FCER2	blue
SPATC1	blue
MGST3	blue
CTBP1-AS	blue
LOC101929084	blue
PRPSAP1	blue
WWC2-AS2	blue
FATE1	blue
ESRRB	blue
WDR38	blue
LINC00427	blue
GRIK1-AS1	blue
TPPP2	blue
SNORA65	blue
ZAN	blue
RPL9	blue
LOC101927829	blue
HIST1H1B	blue
LOC101928327	blue
OR2M4	blue
LINC00514	blue
CXorf31	blue
TAF9B	blue
FCRL2	blue
ALB	blue
LOC284798	blue
PARP4	blue
LOC101929064	blue
G6PC2	blue
MIER2	blue
IGJ	blue
CACNG8	blue
SIRT2	blue
GFRA4	blue
LINC00167	blue
KRTAP10-11	blue
RNF146	blue
TEX101	blue
LOC101929464	blue
FAM170B	blue
LOC100133461	blue
MTMR11	blue
GPR150	blue
LOC284240	blue
LY6G6E	blue
ANKAR	blue
USP30-AS1	blue
PCDHA2	blue
SLC18B1	blue
CACNB1	blue
REG1A	blue
SCMH1	blue
ABO	blue
LINC01101	blue
KIAA0125	blue
SEMA5B	blue
SIGLEC11	blue
VRTN	blue
ACTL6B	blue
TLX2	blue
MEP1B	blue
GDF5	blue
MEP1A	blue
ONECUT3	blue
MYH7B	blue
CCDC170	blue
KIR2DS2	blue
RBM41	blue
CABP2	blue
PHYHIP	blue
LOC283674	blue
AIG1	blue
KCNF1	blue
WFDC8	blue
LOC101929478	blue
LOC101928386	blue
MCF2L2	blue
LOC390705	blue
ARMC12	blue
RAG1	blue
MUC12	blue
OPRL1	blue
KIR2DL5A	blue
PDE6H	blue
RAD9B	blue
SLFNL1	blue
TTC9B	blue
LINC01342	blue
RNF19A	blue
VPS13A-AS1	blue
COX4I2	blue
HMHB1	blue
TDRD12	blue
MYLK2	blue
LINC00290	blue
RIPPLY1	blue
LIPG	blue
C7orf62	blue
LOC375196	blue
LINC00032	blue
LINC00967	blue
LOC101927278	blue
RAX2	blue
HFE2	blue
ITGA9	blue
SERPINA7	blue
G6PC	blue
GCH1	blue
HAO2	blue
CCL21	blue
LOC100288123	blue
N4BP1	blue
KRTAP3-3	blue
CT55	blue
CD3D	blue
CLHC1	blue
LINC00628	blue
HSPB9	blue
C19orf80	blue
CCT8L2	blue
ANKRD30A	blue
NHLH2	blue
NLRP6	blue
CST9	blue
STRN	blue
LMOD2	blue
RPS7	blue
LMX1B	blue
IL25	blue
HAMP	blue
LYVE1	blue
SLC22A6	blue
LOC100996740	blue
SSTR5	blue
LOC102725408	blue
TNFRSF13C	blue
CCR8	blue
KRT80	blue
FER	blue
TRAF3IP2	blue
CHIAP2	blue
LINC01144	blue
NUP54	blue
WWTR1-AS1	blue
HCN4	blue
KIR2DL1	blue
SMG7	blue
C17orf64	blue
RBP5	blue
SDK1	blue
FAM159A	blue
CARS-AS1	blue
NMUR1	blue
GPR161	blue
ZBTB20	blue
LOC100131170	blue
CST11	blue
TMEM151B	blue
YBX2	blue
IQCF1	blue
CLECL1	blue
LOC101928834	blue
LOC102724905	blue
INSL6	blue
C22orf31	blue
NUMA1	blue
CDRT15	blue
KLF17	blue
LINC01192	blue
LINC00327	blue
NKIRAS1	blue2
FBXW11	blue2
PIGC	blue2
OR3A2	blue2
TOP1MT	blue2
HADH	blue2
DIAPH1	blue2
GPAA1	blue2
TSPAN17	blue2
C11orf83	blue2
CYC1	blue2
C8orf82	blue2
FRAT2	blue2
DIS3L2	blue2
ZC3H3	blue2
EXOSC4	blue2
SHARPIN	blue2
PRR7	blue2
GRK6	blue2
FRAT1	blue2
LOC101929229	blue2
DDX41	blue2
PRELID1	blue2
AMIGO1	blue2
MFSD3	blue2
ARID5A	blue2
WARS2	blue2
RMND5B	blue2
MGAT1	blue2
CEP89	blue2
THEM6	blue2
SSSCA1	blue2
SLC20A2	blue2
SLC52A2	blue2
MAF1	blue2
PYCRL	blue2
PFN4	blue2
DGAT1	blue2
TONSL	blue2
UBE4B	blue2
EPS8	blue2
FAF2	blue2
SAMD1	blue2
CAND2	blue2
DLGAP2-AS1	blue2
BAK1	blue2
NABP2	blue2
UIMC1	blue2
TSTA3	blue2
ZNF16	blue2
CS	blue2
NHP2	blue2
HIGD2A	blue2
NOP16	blue2
GRINA	blue2
HSF1	blue2
POLH	blue2
LINC00644	blue2
CYHR1	blue2
IMMT	blue2
HGH1	blue2
C19orf40	blue2
ZNF346	blue2
NSD1	blue2
GARNL3	blue2
RECQL4	blue2
ATP1A1	blue2
CLTB	blue2
BAD	blue2
CMAS	brown
LYRM5	brown
GLI2	brown
JAK3	brown
TFAP2A	brown
PITPNA-AS1	brown
PHF1	brown
PARP10	brown
FUT8-AS1	brown
TMEM246	brown
PLEKHA6	brown
EPB41L5	brown
GTF2IRD1	brown
NPR3	brown
SLC7A2	brown
ANKS6	brown
BRMS1L	brown
FST	brown
KCTD10	brown
RPE	brown
SEC14L1P1	brown
JADE1	brown
CRISPLD2	brown
MGRN1	brown
GRIN2D	brown
RGCC	brown
THEM5	brown
FNDC4	brown
SBNO2	brown
NUBPL	brown
LINC00669	brown
PFKM	brown
UACA	brown
NBEA	brown
RTEL1	brown
YAP1	brown
ADAM11	brown
WHAMM	brown
POLG	brown
ID2B	brown
TTLL3	brown
LOC101927815	brown
CERS5	brown
LRRCC1	brown
CHCHD7	brown
FBXO11	brown
NUTM2A-AS1	brown
MRC2	brown
COX11	brown
TTC9C	brown
FAM172A	brown
AKT3	brown
TNIP1	brown
CDC42EP3	brown
SNN	brown
MAN1A1	brown
MTPN	brown
GCHFR	brown
FBXO6	brown
REPS2	brown
MKNK2	brown
RBM4	brown
RIMKLB	brown
HOXA1	brown
NHS	brown
SLC16A4	brown
CEBPD	brown
DEFB126	brown
LOC100506713	brown
CROCC	brown
SNX27	brown
C11orf74	brown
GOLT1B	brown
LDHD	brown
FLJ42627	brown
SLIT2	brown
MFSD12	brown
GPRC5C	brown
ARRB1	brown
GXYLT2	brown
GRAMD4	brown
C14orf142	brown
KCTD12	brown
CELF6	brown
DAPK1	brown
NFIX	brown
SNORA78	brown
ZFP62	brown
RPH3AL	brown
MID2	brown
NFIB	brown
TRIM11	brown
PCDHGB6	brown
LOC100287896	brown
SEZ6L2	brown
SSB	brown
GTF2E1	brown
ZNF500	brown
RANBP6	brown
FURIN	brown
SLC1A3	brown
FAR2	brown
CRY2	brown
TAOK2	brown
DTNA	brown
PLEKHH2	brown
EFNB2	brown
TMEM133	brown
EPHX4	brown
ANXA1	brown
KIAA0753	brown
LOC729683	brown
DLX5	brown
OPLAH	brown
DYNC2LI1	brown
RPS25	brown
FMO9P	brown
MBNL2	brown
SH3RF2	brown
PTGR2	brown
SAMD9	brown
LOC100287525	brown
GADD45B	brown
PNPLA6	brown
RNASET2	brown
NAA50	brown
AKAP13	brown
PPIB	brown
MAN1B1-AS1	brown
ARHGAP42	brown
GLS	brown
PDZK1IP1	brown
TSPYL5	brown
HAUS3	brown
ARHGDIB	brown
ARRDC2	brown
UGT2B28	brown
MAML2	brown
LGALS8	brown
FOXO6	brown
PPFIA1	brown
TUNAR	brown
VCAN	brown
NID2	brown
TMEM126B	brown
TTF1	brown
POLL	brown
COQ6	brown
CCDC82	brown
LTBP2	brown
KRBA1	brown
CXorf30	brown
EDEM2	brown
TRMU	brown
GFOD1	brown
LARP1B	brown
RXFP1	brown
HSP90B1	brown
RBL2	brown
DCAF12L1	brown
HEMK1	brown
TIMD4	brown
APOL2	brown
SEMA4A	brown
GNL2	brown
SLC1A1	brown
HCFC2	brown
PPP1R3A	brown
SIX4	brown
E4F1	brown
BC048103 /// CSGALNACT1	brown
GINS3	brown
FAM160B2	brown
LRRC61	brown
SLCO4A1	brown
ADCY10P1	brown
TAMM41	brown
LINC00960	brown
[truncated: 18,487 more rows]
